# Supplementary material
Source: ML conference proceedings conference paper supplement (https://proceedings.mlr.press/v48/xuc16.html)
Supplement: Supplementary file [file xuc16-supp.pdf]

---

# Learning Granger Causality for Hawkes Processes

## Supplementary File

---

**Hongteng Xu**

School of ECE, Georgia Institute of Technology

HXU42@GATECH.EDU

**Mehrdad Farajtabar**

College of Computing, Georgia Institute of Technology

MEHRDAD@GATECH.EDU

**Hongyuan Zha**

College of Computing, Georgia Institute of Technology

ZHA@CC.GATECH.EDU

## 1. Appendix

### 1.1. Derivation of Surrogate Objective Function

Using the Jensen's inequality, we have following inequality for all  $c$  and  $i$ :

$$\begin{aligned} & \log \left( \mu_{u_i^c} + \sum_{m=1}^M \sum_{j=1}^{i-1} a_{u_i^c u_j^c}^m \kappa(\tau_{ij}^c) \right) \\ & \geq p_{ii} \log \left( \frac{\mu_{u_i^c}}{p_{ii}} \right) + \sum_{m=1}^M \sum_{j=1}^{i-1} p_{ij}^m \log \left( \frac{a_{u_i^c u_j^c}^m \kappa(\tau_{ij}^c)}{p_{ij}^m} \right). \end{aligned}$$

The equation holds if and only if  $\mu_u = \mu_u^{(k)}$  and  $a_{uu'}^m = a_{uu'}^{m,(k)}$ . Therefore, we have  $Q_{\Theta|\Theta^{(k)}} \geq \mathcal{L}_{\Theta}$  and  $Q_{\Theta^{(k)}|\Theta^{(k)}} = \mathcal{L}_{\Theta^{(k)}}$ .

### 1.2. Derivation of Learning Algorithm

We have surrogate objective function  $F = -Q_{\Theta|\Theta^{(k)}} + \alpha_S \|\mathbf{A}\|_1 + \alpha_G \|\mathbf{A}\|_{1,2} + \alpha_P E_{\Theta|\Theta^{(k)}}(\mathbf{A})$ , where  $Q = -Q_{\Theta|\Theta^{(k)}} + \alpha_P E_{\Theta|\Theta^{(k)}}(\mathbf{A})$  is the data fidelity term. Similar to (Simon et al., 2013), we choose a group  $a_{uu'} = [a_{uu'}^1, \dots, a_{uu'}^M]^\top$  to minimize and fix other parameters. Given current estimate  $a_{uu'}^{(k)}$ , we majorize  $Q$  as

$$\begin{aligned} Q & \leq Q|_{a_{uu'}^{(k)}} + (a_{uu'} - a_{uu'}^{(k)}) \nabla_{a_{uu'}} Q|_{a_{uu'}^{(k)}} \\ & \quad + \frac{1}{2\eta} \|a_{uu'} - a_{uu'}^{(k)}\|_2^2. \end{aligned} \quad (1)$$

Introducing (1) to the surrogate objective function, we rewrite the optimization problem as

$$\begin{aligned} \min_{a_{uu'} \geq \mathbf{0}} & Q|_{a_{uu'}^{(k)}} + (a_{uu'} - a_{uu'}^{(k)}) \nabla_{a_{uu'}} Q|_{a_{uu'}^{(k)}} \\ & + \frac{1}{2\eta} \|a_{uu'} - a_{uu'}^{(k)}\|_2^2 + \alpha_S \|a_{uu'}\|_1 \\ & + \alpha_G \|a_{uu'}\|_2. \end{aligned} \quad (2)$$

Because both  $Q|_{a_{uu'}^{(k)}}$  and  $\nabla_{a_{uu'}} Q|_{a_{uu'}^{(k)}}$  are known, we add  $\frac{\eta}{2} \|\nabla_{a_{uu'}} Q|_{a_{uu'}^{(k)}}\|_2^2$  to the objective function of (2) and reduce  $Q|_{a_{uu'}^{(k)}}$  from it, and obtain an equivalent optimization problem

$$\begin{aligned} \min_{a_{uu'} \geq \mathbf{0}} & \frac{1}{2\eta} \|a_{uu'} - (a_{uu'}^{(k)} - \eta \nabla_{a_{uu'}} Q|_{a_{uu'}^{(k)}})\|_2^2 \\ & + \alpha_S \|a_{uu'}\|_1 + \alpha_G \|a_{uu'}\|_2. \end{aligned} \quad (3)$$

The objective function in (3) is convex, so the optimal solution is characterized by the subgradient equations.

$$a_{uu'}^{(k)} - \eta \nabla_{a_{uu'}} Q|_{a_{uu'}^{(k)}} - a_{uu'} = \eta \alpha_S \gamma + \eta \alpha_G \beta. \quad (4)$$

$\gamma = [\gamma_1, \dots, \gamma_M]^\top$ , where  $\gamma_m = 1$  if  $a_{uu'}^m > 0$ , and in  $[0, 1]$  otherwise.  $\beta = \frac{a_{uu'}}{\|a_{uu'}\|_2}$  if  $a_{uu'} \neq \mathbf{0}$ , and in the set  $\{x \| \|x\|_2 \leq 1\}$  otherwise. Combining the subgradient equations with the basic algebra in (Simon et al., 2013), we get that  $a_{uu'} = \mathbf{0}$  if  $\|S_{\eta \alpha_S} (a_{uu'}^{(k+1)} - \eta \nabla_{a_{uu'}} Q|_{a_{uu'}^{(k)}})\|_2 \leq \eta \alpha_G$  holds, otherwise  $a_{uu'}$  satisfies

$$\begin{aligned} & \left( 1 + \frac{\eta \alpha_G}{\|a_{uu'}\|_2} \right) a_{uu'} \\ & = S_{\eta \alpha_S} (a_{uu'}^{(k)} - \eta \nabla_{a_{uu'}} Q|_{a_{uu'}^{(k)}}), \end{aligned} \quad (5)$$

where  $S_\alpha(z) = \text{sign}(z)(|z| - \alpha)_+$  achieves soft-thresholding for each element of input. Taking the norm on both sides,  $\|a_{uu'}\|_2$  can be replaced by

$$(\|S_{\eta \alpha_S} (a_{uu'}^{(k)} - \eta \nabla_{a_{uu'}} Q|_{a_{uu'}^{(k)}})\|_2 - t\eta \alpha_G)_+. \quad (6)$$

Replacing the  $\|a_{uu'}\|_2$  in (5) with (6), we obtain the generalized gradient step:

$$a_{uu'}^{(k+1)} = \left( 1 - \frac{\eta\alpha_G}{\|S_{\eta\alpha_S}(a_{uu'}^{(k+1)}) - \eta\nabla_{a_{uu'}}Q|_{a_{uu'}^{(k)}}\|_2} \right)_+ \times S_{\eta\alpha_S}(a_{uu'}^{(k+1)}) - \eta\nabla_{a_{uu'}}Q|_{a_{uu'}^{(k)}} \quad (7)$$

### 1.3. Details of Basis Function Selection

In our model, the intensity function of Hawkes process over all dimensions is:

$$\begin{aligned} \lambda(t) &= \sum_{u=1}^U \lambda_u(t) \\ &= \sum_{u=1}^U \left( \mu_u + \sum_{u'=1}^U \int_0^t \phi_{uu'}(s) dN_{u'}(t-s) \right) \\ &= \sum_{u=1}^U \mu_u + \sum_{u=1}^U \sum_{u=1}^U \sum_{t_i < t} \phi_{uu_i}(t-t_i) \\ &= \sum_{u=1}^U \mu_u + \sum_{u=1}^U \sum_{u=1}^U \sum_{t_i < t} \sum_{m=1}^M a_{uu_i}^m \kappa_m(t-t_i). \end{aligned} \quad (8)$$

Applying Fourier transform, we have

$$\begin{aligned} \hat{\lambda}(\omega) &= \sum_{u=1}^U \mu_u \sqrt{2\pi} \delta(\omega) \\ &\quad + \sum_{u=1}^U \sum_{u=1}^U \sum_{t_i < t} \sum_{m=1}^M a_{uu_i}^m e^{-j\omega t_i} \hat{\kappa}_m(\omega). \end{aligned} \quad (9)$$

In other words, the spectral of  $\lambda(t)$  is the weighted sum of those of basis functions. Therefore, the cut-off frequency of basis function is bounded by that of intensity function.

As we show in our paper, given training sequences  $\mathcal{S} = \{s_c\}_{c=1}^C$ , where  $s_c = \{(t_i^c, u_i^c)\}_{i=1}^{N_c}$ , we can estimate  $\lambda(t)$  empirically via a Gaussian-based kernel density estimator:

$$\lambda(t) = \sum_{c=1}^C \sum_{i=1}^{N_c} G_h(t-t_i^c). \quad (10)$$

Here  $t_i^c$  is the time stamp of the  $i$ -th event at the  $c$ -th sequence.  $G_h(t-t_i^c) = \exp(-\frac{(t-t_i^c)^2}{2h^2})$  is a Gaussian kernel with the bandwidth  $h$ .

Because we only care about the selection of basis functions, we just need to estimate the spectral of  $\lambda(t)$  rather than compute (10) directly. Specifically, applying Silverman's rule of thumb (Silverman, 1986), we first set optimal  $h = (\frac{4\hat{\sigma}^5}{3\sum_{c=1}^C N_c})^{0.2}$ , where  $\hat{\sigma}$  is the standard deviation of time stamps  $\{t_i^c\}$ . Applying Fourier transform, we compute an

upper bound for the spectral of  $\lambda(t)$  as

$$\begin{aligned} |\hat{\lambda}(\omega)| &= \left| \int_{-\infty}^{\infty} \lambda(t) e^{-j\omega t} dt \right| \\ &= \left| \sum_{c=1}^C \sum_{i=1}^{N_c} \int_{-\infty}^{\infty} e^{-\frac{(t-t_i^c)^2}{2h^2}} e^{-j\omega t} dt \right| \\ &\leq \sum_{c=1}^C \sum_{i=1}^{N_c} \left| \int_{-\infty}^{\infty} e^{-\frac{(t-t_i^c)^2}{2h^2}} e^{-j\omega t} dt \right| \\ &= \sum_{c=1}^C \sum_{i=1}^{N_c} \left| e^{-j\omega t_i^c} e^{-\frac{\omega^2 h^2}{2}} \sqrt{2\pi h^2} \right| \\ &\leq \sum_{c=1}^C \sum_{i=1}^{N_c} \left| e^{-j\omega t_i^c} \right| \left| e^{-\frac{\omega^2 h^2}{2}} \sqrt{2\pi h^2} \right| \\ &= \left( \sum_{c=1}^C N_c \sqrt{2\pi h^2} \right) e^{-\frac{\omega^2 h^2}{2}}. \end{aligned} \quad (11)$$

Furthermore, we can compute the upper bound of the absolute sum of the spectral higher than  $\omega_0$  as

$$\begin{aligned} &\int_{\omega_0}^{\infty} |\hat{\lambda}(\omega)| d\omega \\ &\leq \left( \sum_{c=1}^C N_c \sqrt{2\pi h^2} \right) \int_{\omega_0}^{\infty} e^{-\frac{\omega^2 h^2}{2}} d\omega \\ &= 2\pi \left( \sum_{c=1}^C N_c \right) \int_{\omega_0}^{\infty} \frac{h}{\sqrt{2\pi}} e^{-\frac{\omega^2 h^2}{2}} d\omega \\ &= 2\pi \left( \sum_{c=1}^C N_c \right) \left( \frac{1}{2} - \int_0^{\omega_0} \frac{h}{\sqrt{2\pi}} e^{-\frac{\omega^2 h^2}{2}} d\omega \right) \\ &= 2\pi \left( \sum_{c=1}^C N_c \right) \left( \frac{1}{2} - \frac{1}{2} \int_{-\omega_0}^{\omega_0} \frac{h}{\sqrt{2\pi}} e^{-\frac{\omega^2 h^2}{2}} d\omega \right) \\ &= \pi \left( \sum_{c=1}^C N_c \right) \left( 1 - \frac{1}{\sqrt{2}} \text{erf}(\omega_0 h) \right), \end{aligned} \quad (12)$$

where  $\text{erf}(x) = \frac{1}{\sqrt{\pi}} \int_{-x}^x e^{-t^2} dt$ .

Therefore, give a bound of residual  $\epsilon$ , we can find an  $\omega_0$  guaranteeing  $\int_{\omega_0}^{\infty} |\hat{\lambda}(\omega)| d\omega \leq \epsilon$ , or  $\text{erf}(\omega_0 h) \geq \sqrt{2} - \frac{\sqrt{2}\epsilon}{\pi \sum_{c=1}^C N_c}$ . The proposed basis functions  $\{\kappa_{\omega_0}(t, t_m)\}_{m=1}^M$  are selected, where  $\omega_0$  is the cut-off frequency of basis function and  $t_m = \frac{(m-1)T}{M}$ ,  $M = \lceil \frac{T\omega_0}{\pi} \rceil$ .

### 1.4. Configuration of Parameters

With the help of cross validation, we test our algorithm with various parameters in a wide range, where  $\alpha_P, \alpha_S, \alpha_G \in [10^{-2}, 10^4]$ . According to the measure *Loglike*, we set  $\alpha_S = 10$ ,  $\alpha_G = 100$ ,  $\alpha_P = 1000$ . The curves of *Loglike* w.r.t. the three parameters are shown in the following

figure. We can find that the learning result is relatively stable when changing the parameters in a wide range.

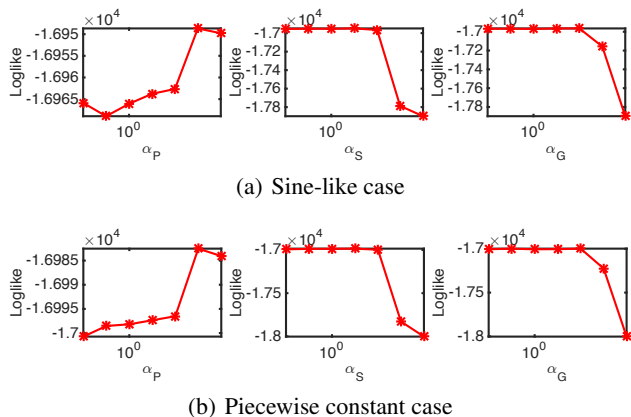

Figure 1. The curves of *Loglike* w.r.t. the change of  $\alpha_P$ ,  $\alpha_G$  and  $\alpha_S$  are shown. In each subfigure, left:  $\alpha_G = 100$ ,  $\alpha_S = 10$ ,  $\alpha_P \in [10^{-2}, 10^4]$ ; middle:  $\alpha_G = 100$ ,  $\alpha_P = 1000$ ,  $\alpha_S \in [10^{-2}, 10^4]$ ; right:  $\alpha_P = 1000$ ,  $\alpha_S = 10$ ,  $\alpha_G \in [10^{-2}, 10^4]$ . The number of training sequence is 250.

## References

Silverman, Bernard W. *Density estimation for statistics and data analysis*, volume 26. CRC press, 1986.

Simon, Noah, Friedman, Jerome, Hastie, Trevor, and Tibshirani, Robert. A sparse-group lasso. *Journal of Computational and Graphical Statistics*, 22(2):231–245, 2013.
